# Supplementary material for: Macular vessel density in the superficial plexus is not a proxy of cerebrovascular damage in non-demented individuals: data from the NORFACE cohort
Source: PubMed Central journal article supplement (PMC10877901; doi:10.1186/s13195-024-01408-9), 2024-02-20
Supplement: 13195_2024_1408_MOESM1_ESM.pdf [file 13195_2024_1408_MOESM1_ESM.pdf]

**Additional file 1**

|             | <b>Variables</b>                | <b>Coefficient</b> | <b>95% CI</b> | <b>t</b> | <b>Significance</b> | <b>Beta</b> |
|-------------|---------------------------------|--------------------|---------------|----------|---------------------|-------------|
| VD Nasal    | Age                             | -0.10              | -0.18 – -0.01 | 2.27     | 0.027*              | -0.19       |
|             | Sex                             | -0.66              | -1.82 – 0.51  | 1.11     | 0.267               | -0.08       |
|             | Education                       | 0.04               | -0.08 – 0.16  | 0.66     | 0.514               | 0.05        |
|             | <i>APOE</i> $\epsilon$ 4 status | 0.19               | -1.08 – 1.46  | 0.30     | 0.766               | 0.02        |
|             | A status                        | -0.55              | -1.92 – 0.82  | 0.80     | 0.427               | -0.07       |
|             | Syndromic diagnosis             | 1.03               | -0.22 – 2.29  | 1.63     | 0.106               | 0.14        |
| VD Temporal | Age                             | -0.10              | -0.17 – -0.02 | 2.63     | 0.009*              | -0.21       |
|             | Sex                             | -1.09              | -2.08 – -0.09 | 2.15     | 0.033*              | -0.15       |
|             | Education                       | 0.02               | -0.09 – 0.12  | 0.34     | 0.738               | 0.03        |
|             | <i>APOE</i> $\epsilon$ 4 status | 0.01               | -1.08 – 1.09  | 0.01     | 0.991               | 0.00        |
|             | A status                        | 0.04               | -1.13 – 1.21  | 0.07     | 0.948               | 0.01        |
|             | Syndromic diagnosis             | 1.26               | 0.19 – 2.34   | 2.32     | 0.022*              | 0.18        |
| VD Superior | Age                             | -0.09              | -0.20 – 0.02  | 1.65     | 0.100               | -0.14       |
|             | Sex                             | 0.27               | -1.16 – 1.71  | 0.37     | 0.709               | 0.03        |
|             | Education                       | 0.14               | -0.01 – 0.28  | 1.80     | 0.074               | 0.14        |
|             | <i>APOE</i> $\epsilon$ 4 status | 0.09               | -1.48 – 1.66  | 0.11     | 0.910               | 0.01        |
|             | A status                        | -0.44              | -2.13 – 1.25  | 0.52     | 0.606               | -0.04       |
|             | Syndromic diagnosis             | 1.60               | 0.05 – 3.14   | 2.04     | 0.043*              | 0.17        |
| VD Inferior | Age                             | -0.15              | -0.28 – -0.03 | 2.43     | 0.016*              | -0.21       |
|             | Sex                             | 0.05               | -1.62 – 1.71  | 0.05     | 0.957               | 0.00        |
|             | Education                       | 0.05               | -0.12 – 0.22  | 0.56     | 0.575               | 0.05        |
|             | <i>APOE</i> $\epsilon$ 4 status | 0.34               | -1.48 – 2.16  | 0.37     | 0.712               | 0.03        |
|             | A status                        | 0.18               | -1.77 – 2.14  | 0.19     | 0.853               | 0.02        |
|             | Syndromic diagnosis             | 1.06               | -0.73 – 2.85  | 1.16     | 0.246               | 0.10        |
