# Supplementary material for: Macular vessel density in the superficial plexus is not a proxy of cerebrovascular damage in non-demented individuals: data from the NORFACE cohort
Source: PubMed Central journal article supplement (PMC10877901; doi:10.1186/s13195-024-01408-9), 2024-02-20
Supplement: 13195_2024_1408_MOESM2_ESM.pdf [file 13195_2024_1408_MOESM2_ESM.pdf]

**Additional file 2**

| <b>Variables</b>    | <b>Coefficient</b> | <b>t</b> | <b>Significance</b> | <b>Beta</b> |
|---------------------|--------------------|----------|---------------------|-------------|
| Age                 | -62.82             | 7.01     | <0.001*             | -0.48       |
| Sex                 | -151.54            | 1.25     | 0.215               | -0.08       |
| Syndromic diagnosis | 81.54              | 0.65     | 0.518               | 0.04        |
| Hypertension        | -110.09            | 0.84     | 0.401               | -0.05       |
| Diabetes mellitus   | -4.68              | 0.02     | 0.985               | -0.00       |
| Dyslipidemia        | -151.00            | 1.25     | 0.212               | -0.08       |
| Heart disease       | -89.46             | 0.45     | 0.651               | -0.03       |
| Respiratory disease | -164.34            | 0.87     | 0.384               | -0.05       |
| Smoking             | 80.33              | 0.63     | 0.530               | 0.04        |
| VD Nasal            | 53.91              | 2.75     | 0.007*              | 0.22        |
| VD Temporal         | -15.69             | 0.64     | 0.523               | -0.06       |
| VD Superior         | -11.87             | 0.84     | 0.405               | -0.06       |
| VD Inferior         | 12.52              | 1.12     | 0.263               | 0.07        |
