# Supplementary material for: Macular vessel density in the superficial plexus is not a proxy of cerebrovascular damage in non-demented individuals: data from the NORFACE cohort
Source: PubMed Central journal article supplement (PMC10877901; doi:10.1186/s13195-024-01408-9), 2024-02-20
Supplement: 13195_2024_1408_MOESM3_ESM.pdf [file 13195_2024_1408_MOESM3_ESM.pdf]

### Additional file 3

| <b>Variables</b> | <b>Coefficient</b> | <b>t</b> | <b>Significance</b> | <b>Beta</b> |
|------------------|--------------------|----------|---------------------|-------------|
| VD Nasal         | 59.21              | 2.63     | 0.009*              | 0.24        |
| VD Temporal      | 25.00              | 0.93     | 0.353               | 0.09        |
| VD Superior      | -19.01             | 1.19     | 0.238               | -0.09       |
| VD Inferior      | 30.66              | 2.46     | 0.015               | 0.18        |
