# Supplementary material for: Macular vessel density in the superficial plexus is not a proxy of cerebrovascular damage in non-demented individuals: data from the NORFACE cohort
Source: PubMed Central journal article supplement (PMC10877901; doi:10.1186/s13195-024-01408-9), 2024-02-20
Supplement: 13195_2024_1408_MOESM4_ESM.pdf [file 13195_2024_1408_MOESM4_ESM.pdf]

**Additional file 4**

| <b>Variables</b>    | <b>Coefficient</b> | <b>t</b> | <b>Significance</b> | <b>Beta</b> |
|---------------------|--------------------|----------|---------------------|-------------|
| Age                 | 0.02               | 4.78     | <0.001*             | 0.37        |
| Sex                 | 0.11               | 1.55     | 0.122               | 0.11        |
| Syndromic diagnosis | 0.05               | 0.69     | 0.492               | 0.05        |
| Hypertension        | 0.04               | 0.52     | 0.604               | 0.04        |
| Diabetes mellitus   | 0.50               | 3.53     | 0.001*              | 0.24        |
| Dyslipidemia        | -0.03              | 0.37     | 0.711               | -0.03       |
| Heart disease       | 0.08               | 0.69     | 0.490               | 0.05        |
| Respiratory disease | -0.00              | 0.04     | 0.968               | -0.00       |
| Smoking             | -0.07              | 0.96     | 0.337               | -0.07       |
| VD Nasal            | -0.00              | 0.04     | 0.969               | -0.00       |
| VD Temporal         | -0.00              | 0.05     | 0.961               | -0.00       |
| VD Superior         | -0.00              | 0.45     | 0.657               | -0.04       |
| VD Inferior         | 0.00               | 0.19     | 0.849               | 0.01        |
