# Supplementary material for: Macular vessel density in the superficial plexus is not a proxy of cerebrovascular damage in non-demented individuals: data from the NORFACE cohort
Source: PubMed Central journal article supplement (PMC10877901; doi:10.1186/s13195-024-01408-9), 2024-02-20
Supplement: 13195_2024_1408_MOESM5_ESM.pdf [file 13195_2024_1408_MOESM5_ESM.pdf]

**Additional file 5**

| <b>Variables</b> | <b>Coefficient</b> | <b>t</b> | <b>Significance</b> | <b>Beta</b> |
|------------------|--------------------|----------|---------------------|-------------|
| VD Nasal         | -0.00              | 0.32     | 0.752               | -0.03       |
| VD Temporal      | -0.02              | 1.05     | 0.295               | -0.11       |
| VD Superior      | -0.00              | 0.19     | 0.849               | -0.02       |
| VD Inferior      | -0.01              | 0.92     | 0.361               | -0.07       |
