# Supplementary material for: Macular vessel density in the superficial plexus is not a proxy of cerebrovascular damage in non-demented individuals: data from the NORFACE cohort
Source: PubMed Central journal article supplement (PMC10877901; doi:10.1186/s13195-024-01408-9), 2024-02-20
Supplement: 13195_2024_1408_MOESM6_ESM.pdf [file 13195_2024_1408_MOESM6_ESM.pdf]

**Additional file 6**

| <b>Variables</b>    | <b>Coefficient</b> | <b>t</b> | <b>Significance</b> | <b>Beta</b> |
|---------------------|--------------------|----------|---------------------|-------------|
| Age                 | -0.00              | 0.61     | 0.541               | -0.04       |
| Sex                 | 0.01               | 0.64     | 0.521               | 0.04        |
| Syndromic diagnosis | -0.15              | 6.95     | <0.001*             | -0.49       |
| Hypertension        | -0.02              | 0.85     | 0.399               | -0.06       |
| Diabetes mellitus   | -0.00              | 0.11     | 0.912               | -0.01       |
| Dyslipidemia        | -0.05              | 2.49     | 0.014               | -0.17       |
| Heart disease       | 0.03               | 0.79     | 0.432               | 0.05        |
| Respiratory disease | 0.02               | 0.64     | 0.521               | 0.04        |
| Smoking             | -0.03              | 1.43     | 0.156               | -0.10       |
| VD Nasal            | 0.00               | 1.19     | 0.235               | 0.10        |
| VD Temporal         | 0.00               | 0.40     | 0.691               | 0.04        |
| VD Superior         | -0.00              | 0.67     | 0.506               | -0.05       |
| VD Inferior         | -0.00              | 0.99     | 0.325               | -0.07       |
