# Supplementary material for: Macular vessel density in the superficial plexus is not a proxy of cerebrovascular damage in non-demented individuals: data from the NORFACE cohort
Source: PubMed Central journal article supplement (PMC10877901; doi:10.1186/s13195-024-01408-9), 2024-02-20
Supplement: 13195_2024_1408_MOESM7_ESM.pdf [file 13195_2024_1408_MOESM7_ESM.pdf]

**Additional file 7**

| <b>Variables</b> | <b>Coefficient</b> | <b>t</b> | <b>Significance</b> | <b>Beta</b> |
|------------------|--------------------|----------|---------------------|-------------|
| VD Nasal         | 0.00               | 0.94     | 0.347               | 0.09        |
| VD Temporal      | -0.00              | 0.71     | 0.481               | -0.07       |
| VD Superior      | -0.00              | 0.71     | 0.481               | -0.06       |
| VD Inferior      | -0.00              | 1.59     | 0.115               | -0.12       |
