# Supplementary material for: Macular vessel density in the superficial plexus is not a proxy of cerebrovascular damage in non-demented individuals: data from the NORFACE cohort
Source: PubMed Central journal article supplement (PMC10877901; doi:10.1186/s13195-024-01408-9), 2024-02-20
Supplement: 13195_2024_1408_MOESM8_ESM.pdf [file 13195_2024_1408_MOESM8_ESM.pdf]

**Additional file 8**

| Variables              | OR   |      |      |      | 95 CI%       |              |              |              | Significance |        |        |        |
|------------------------|------|------|------|------|--------------|--------------|--------------|--------------|--------------|--------|--------|--------|
|                        |      |      |      |      |              |              |              |              |              |        |        |        |
| Age                    | 1.14 | 1.14 | 1.15 | 1.15 | 1.04 – 1.27  | 1.04 – 1.27  | 1.05 – 1.28  | 1.05 – 1.28  | 0.011*       | 0.010* | 0.006* | 0.004* |
| Sex                    | 2.47 | 2.73 | 2.26 | 1.79 | 0.70 – 10.73 | 0.76 – 12.14 | 0.66 – 9.15  | 0.51 – 7.35  | 0.186        | 0.147  | 0.216  | 0.384  |
| Syndromic diagnosis    | 0.44 | 0.41 | 0.43 | 0.41 | 0.11 – 1.64  | 0.10 – 1.50  | 0.10 – 1.61  | 0.10 – 1.53  | 0.237        | 0.193  | 0.224  | 0.200  |
| Hypertension           | 6.04 | 5.59 | 5.92 | 6.05 | 1.82 – 22.71 | 1.65 – 21.17 | 1.77 – 22.47 | 1.80 – 23.11 | 0.005*       | 0.007* | 0.005* | 0.005* |
| Diabetes mellitus      | 1.38 | 1.45 | 1.27 | 1.51 | 0.17 – 7.71  | 0.17 – 8.18  | 0.15 – 7.09  | 0.18 – 8.79  | 0.735        | 0.696  | 0.798  | 0.668  |
| Dyslipidemia           | 0.38 | 0.36 | 0.37 | 0.39 | 0.10 – 1.28  | 0.10 – 1.23  | 0.10 – 1.26  | 0.10 – 1.36  | 0.135        | 0.120  | 0.128  | 0.158  |
| Heart disease          | 0.78 | 0.80 | 0.76 | 0.72 | 0.08 – 4.87  | 0.08 – 5.32  | 0.08 – 4.58  | 0.08 – 4.29  | 0.805        | 0.832  | 0.787  | 0.740  |
| Respiratory disease    | 4.22 | 4.17 | 4.17 | 4.09 | 0.80 – 22.05 | 0.79 – 21.98 | 0.79 – 21.97 | 0.73 – 22.82 | 0.081        | 0.085  | 0.086  | 0.101  |
| Smoking                | 6.57 | 7.75 | 6.82 | 5.95 | 1.76 – 29.29 | 1.98 – 37.72 | 1.82 – 30.38 | 1.51 – 27.37 | 0.008*       | 0.006* | 0.007* | 0.014  |
| A status               | 0.00 | 0.00 | 7.02 | inf  | 0.00 – inf   | 0.00 – 68.42 | 0.00 - inf   | 0.46 - inf   | 0.476        | 0.152  | 0.743  | 0.085  |
| VD Nasal               | 1.01 | 1.03 | 1.04 | 1.06 | 0.80 – 1.26  | 0.83 – 1.28  | 0.85 – 1.29  | 0.87 – 1.32  | 0.950        | 0.805  | 0.707  | 0.546  |
| VD Temporal            | 1.17 | 1.08 | 1.18 | 1.12 | 0.91 – 1.53  | 0.81 – 1.45  | 0.92 – 1.54  | 0.88 – 1.47  | 0.241        | 0.605  | 0.203  | 0.389  |
| VD Superior            | 0.91 | 0.91 | 0.92 | 0.90 | 0.80 – 1.02  | 0.80 – 1.02  | 0.80 – 1.08  | 0.79 – 1.01  | 0.115        | 0.110  | 0.293  | 0.088  |
| VD Inferior            | 1.03 | 1.03 | 1.04 | 1.20 | 0.90 – 1.15  | 0.91 – 1.15  | 0.92 – 1.15  | 0.99 – 1.50  | 0.665        | 0.626  | 0.514  | 0.080  |
| VD Nasal * A status    | 1.17 |      |      |      | 0.78 – 1.91  |              |              |              | 0.487        |        |        |        |
| VD Temporal * A status |      | 1.34 |      |      |              | 0.91 – 2.05  |              |              |              | 0.155  |        |        |
| VD Superior * A status |      |      | 0.95 |      |              |              | 0.71 – 1.19  |              |              |        | 0.709  |        |
| VD Inferior * A status |      |      |      | 0.80 |              |              |              | 0.61 – 1.01  |              |        |        | 0.079  |
