# Supplementary material for: Macular vessel density in the superficial plexus is not a proxy of cerebrovascular damage in non-demented individuals: data from the NORFACE cohort
Source: PubMed Central journal article supplement (PMC10877901; doi:10.1186/s13195-024-01408-9), 2024-02-20
Supplement: 13195_2024_1408_MOESM9_ESM.pdf [file 13195_2024_1408_MOESM9_ESM.pdf]

### Additional file 9

| Variables              | Coefficient |       |       |       | Significance |         |         |         | Beta  |       |       |       |
|------------------------|-------------|-------|-------|-------|--------------|---------|---------|---------|-------|-------|-------|-------|
|                        |             |       |       |       |              |         |         |         |       |       |       |       |
| Age                    | 0.05        | 0.05  | 0.05  | 0.05  | <0.001*      | <0.001* | <0.001* | <0.001* | 0.38  | 0.38  | 0.38  | 0.38  |
| Sex                    | 0.06        | 0.06  | 0.05  | 0.05  | 0.680        | 0.692   | 0.704   | 0.748   | 0.03  | 0.03  | 0.03  | 0.02  |
| Syndromic diagnosis    | 0.21        | 0.21  | 0.20  | 0.21  | 0.149        | 0.146   | 0.161   | 0.154   | 0.11  | 0.11  | 0.10  | 0.11  |
| Hypertension           | 0.33        | 0.33  | 0.33  | 0.33  | 0.032        | 0.032   | 0.032   | 0.031   | 0.16  | 0.16  | 0.16  | 0.16  |
| Diabetes mellitus      | 0.59        | 0.59  | 0.59  | 0.60  | 0.042        | 0.043   | 0.042   | 0.038   | 0.14  | 0.14  | 0.14  | 0.14  |
| Dyslipidemia           | -0.05       | -0.05 | -0.05 | -0.03 | 0.749        | 0.714   | 0.740   | 0.843   | -0.02 | -0.03 | -0.02 | -0.01 |
| Heart disease          | 0.09        | 0.10  | 0.09  | 0.07  | 0.683        | 0.674   | 0.711   | 0.751   | 0.03  | 0.03  | 0.03  | 0.02  |
| Respiratory disease    | 0.37        | 0.36  | 0.37  | 0.37  | 0.095        | 0.104   | 0.091   | 0.095   | 0.12  | 0.11  | 0.12  | 0.12  |
| Smoking                | -0.04       | -0.04 | -0.03 | -0.05 | 0.801        | 0.809   | 0.824   | 0.749   | -0.02 | -0.02 | -0.02 | -0.02 |
| A status               | -0.71       | -1.28 | 0.03  | 1.00  | 0.691        | 0.493   | 0.982   | 0.417   | -0.33 | -0.59 | 0.02  | 0.46  |
| VD Nasal               | -0.05       | -0.05 | -0.05 | -0.04 | 0.063        | 0.043   | 0.048   | 0.077   | -0.19 | -0.18 | -0.17 | -0.16 |
| VD Temporal            | 0.05        | 0.05  | 0.06  | 0.05  | 0.058        | 0.152   | 0.053   | 0.071   | 0.19  | 0.16  | 0.19  | 0.18  |
| VD Superior            | -0.01       | -0.01 | -0.01 | -0.01 | 0.550        | 0.549   | 0.650   | 0.484   | -0.05 | -0.05 | -0.04 | -0.06 |
| VD Inferior            | 0.01        | 0.01  | 0.01  | 0.02  | 0.694        | 0.676   | 0.633   | 0.417   | 0.03  | 0.03  | 0.03  | 0.11  |
| VD Nasal * A status    | 0.01        |       |       |       | 0.726        |         |         |         | 0.29  |       |       |       |
| VD Temporal * A status |             | 0.03  |       |       |              | 0.520   |         |         |       | 0.55  |       |       |
| VD Superior * A status |             |       | -0.00 |       |              |         | 0.933   |         |       |       | -0.05 |       |
| VD Inferior * A status |             |       |       | -0.02 |              |         |         | 0.374   |       |       |       | -0.51 |
