# Supplementary material for: Macular vessel density in the superficial plexus is not a proxy of cerebrovascular damage in non-demented individuals: data from the NORFACE cohort
Source: PubMed Central journal article supplement (PMC10877901; doi:10.1186/s13195-024-01408-9), 2024-02-20
Supplement: 13195_2024_1408_MOESM10_ESM.pdf [file 13195_2024_1408_MOESM10_ESM.pdf]

**Additional file 10**

| Variables              | Coefficient |         |         |         | Significance |         |         |         | Beta  |       |       |       |
|------------------------|-------------|---------|---------|---------|--------------|---------|---------|---------|-------|-------|-------|-------|
|                        |             |         |         |         |              |         |         |         |       |       |       |       |
| Age                    | -63.56      | -62.60  | -62.48  | -62.10  | <0.001*      | <0.001* | <0.001* | <0.001* | -0.49 | -0.48 | -0.48 | -0.48 |
| Sex                    | -139.25     | -151.30 | -156.84 | -156.08 | 0.259        | 0.219   | 0.203   | 0.205   | -0.07 | -0.08 | -0.08 | -0.08 |
| Syndromic diagnosis    | 107.98      | 87.33   | 80.88   | 83.69   | 0.403        | 0.492   | 0.523   | 0.509   | 0.06  | 0.05  | 0.04  | 0.04  |
| Hypertension           | -118.03     | -115.45 | -110.62 | -114.93 | 0.373        | 0.385   | 0.406   | 0.387   | -0.06 | -0.06 | -0.05 | -0.06 |
| Diabetes mellitus      | -10.07      | -9.75   | -3.45   | -3.09   | 0.968        | 0.969   | 0.989   | 0.990   | -0.00 | -0.00 | -0.00 | -0.00 |
| Dyslipidemia           | -140.97     | -148.35 | -146.81 | -138.03 | 0.253        | 0.231   | 0.235   | 0.270   | -0.07 | -0.08 | -0.08 | -0.07 |
| Heart disease          | -73.65      | -83.81  | -81.87  | -95.20  | 0.711        | 0.674   | 0.682   | 0.633   | -0.02 | -0.03 | -0.03 | -0.03 |
| Respiratory disease    | -177.78     | -175.75 | -175.14 | -169.53 | 0.350        | 0.358   | 0.360   | 0.373   | -0.06 | -0.06 | -0.06 | -0.06 |
| Smoking                | 68.75       | 77.08   | 76.18   | 72.89   | 0.594        | 0.550   | 0.555   | 0.574   | 0.03  | 0.04  | 0.04  | 0.04  |
| A status               | -inf        | -758.85 | -517.60 | 394.04  | 0.319        | 0.639   | 0.673   | 0.714   | -0.74 | -0.36 | -0.25 | 0.19  |
| VD Nasal               | 41.33       | 52.75   | 53.35   | 55.15   | 0.078        | 0.008*  | 0.008*  | 0.007*  | 0.17  | 0.21  | 0.21  | 0.22  |
| VD Temporal            | -17.20      | -21.03  | -15.49  | -16.60  | 0.487        | 0.449   | 0.531   | 0.506   | -0.06 | -0.08 | -0.06 | -0.06 |
| VD Superior            | -11.97      | -12.03  | -15.80  | -12.71  | 0.403        | 0.401   | 0.358   | 0.379   | -0.06 | -0.06 | -0.08 | -0.06 |
| VD Inferior            | 10.19       | 12.11   | 12.63   | 18.26   | 0.375        | 0.284   | 0.261   | 0.313   | 0.06  | 0.07  | 0.07  | 0.10  |
| VD Nasal * A status    | 32.17       |         |         |         | 0.328        |         |         |         | 0.72  |       |       |       |
| VD Temporal * A status |             | 15.86   |         |         |              | 0.653   |         |         |       | 0.35  |       |       |
| VD Superior * A status |             |         | 9.99    |         |              |         | 0.691   |         |       |       | 0.23  |       |
| VD Inferior * A status |             |         |         | -9.00   |              |         |         | 0.688   |       |       |       | -0.21 |
