# Supplementary material for: Macular vessel density in the superficial plexus is not a proxy of cerebrovascular damage in non-demented individuals: data from the NORFACE cohort
Source: PubMed Central journal article supplement (PMC10877901; doi:10.1186/s13195-024-01408-9), 2024-02-20
Supplement: 13195_2024_1408_MOESM11_ESM.pdf [file 13195_2024_1408_MOESM11_ESM.pdf]

**Additional file 11**

| Variables              | Coefficient |       |       |       | Significance |         |         |         | Beta  |       |       |       |
|------------------------|-------------|-------|-------|-------|--------------|---------|---------|---------|-------|-------|-------|-------|
|                        |             |       |       |       |              |         |         |         |       |       |       |       |
| Age                    | 0.02        | 0.02  | 0.02  | 0.02  | <0.001*      | <0.001* | <0.001* | <0.001* | 0.34  | 0.34  | 0.34  | 0.34  |
| Sex                    | 0.11        | 0.11  | 0.11  | 0.11  | 0.111        | 0.107   | 0.115   | 0.111   | 0.11  | 0.11  | 0.11  | 0.11  |
| Syndromic diagnosis    | 0.05        | 0.05  | 0.05  | 0.05  | 0.497        | 0.463   | 0.509   | 0.511   | 0.05  | 0.05  | 0.05  | 0.05  |
| Hypertension           | 0.05        | 0.05  | 0.05  | 0.05  | 0.531        | 0.537   | 0.526   | 0.526   | 0.05  | 0.05  | 0.05  | 0.05  |
| Diabetes mellitus      | 0.51        | 0.50  | 0.51  | 0.50  | <0.001*      | 0.001*  | <0.001* | 0.001*  | 0.24  | 0.24  | 0.24  | 0.24  |
| Dyslipidemia           | -0.04       | -0.04 | -0.04 | -0.04 | 0.602        | 0.568   | 0.597   | 0.584   | -0.04 | -0.04 | -0.04 | -0.04 |
| Heart disease          | 0.08        | 0.08  | 0.08  | 0.08  | 0.485        | 0.459   | 0.490   | 0.484   | 0.05  | 0.05  | 0.05  | 0.05  |
| Respiratory disease    | 0.00        | -0.01 | 0.00  | 0.00  | 0.990        | 0.953   | 0.988   | 0.980   | 0.00  | -0.00 | 0.00  | 0.00  |
| Smoking                | -0.07       | -0.07 | -0.07 | -0.06 | 0.362        | 0.356   | 0.366   | 0.380   | -0.07 | -0.07 | -0.07 | -0.06 |
| A status               | -0.07       | -0.68 | 0.03  | -0.03 | 0.944        | 0.457   | 0.964   | 0.957   | -0.06 | -0.63 | 0.03  | -0.03 |
| VD Nasal               | -0.00       | -0.00 | 0.00  | -0.00 | 0.954        | 0.962   | 0.980   | 0.994   | -0.01 | -0.00 | 0.00  | -0.00 |
| VD Temporal            | -0.00       | -0.01 | -0.00 | -0.00 | 0.910        | 0.640   | 0.918   | 0.937   | -0.01 | -0.05 | -0.01 | -0.01 |
| VD Superior            | -0.00       | -0.00 | -0.00 | -0.00 | 0.690        | 0.690   | 0.715   | 0.706   | -0.03 | -0.03 | -0.03 | -0.03 |
| VD Inferior            | 0.00        | 0.00  | 0.00  | -0.00 | 0.895        | 0.927   | 0.866   | 0.976   | 0.01  | 0.01  | 0.01  | -0.00 |
| VD Nasal * A status    | 0.00        |       |       |       | 0.880        |         |         |         | 0.12  |       |       |       |
| VD Temporal * A status |             | 0.02  |       |       |              | 0.410   |         |         |       | 0.70  |       |       |
| VD Superior * A status |             |       | 0.00  |       |              |         | 0.954   |         |       |       | 0.04  |       |
| VD Inferior * A status |             |       |       | 0.00  |              |         |         | 0.864   |       |       |       | 0.10  |
