# Supplementary material for: Macular vessel density in the superficial plexus is not a proxy of cerebrovascular damage in non-demented individuals: data from the NORFACE cohort
Source: PubMed Central journal article supplement (PMC10877901; doi:10.1186/s13195-024-01408-9), 2024-02-20
Supplement: 13195_2024_1408_MOESM12_ESM.pdf [file 13195_2024_1408_MOESM12_ESM.pdf]

### Additional file 12

| Variables              | Coefficient |       |       |       | Significance |         |         |         | Beta  |       |       |       |
|------------------------|-------------|-------|-------|-------|--------------|---------|---------|---------|-------|-------|-------|-------|
|                        |             |       |       |       |              |         |         |         |       |       |       |       |
| Age                    | -0.00       | -0.00 | -0.00 | -0.00 | 0.624        | 0.672   | 0.572   | 0.698   | -0.04 | -0.03 | -0.04 | -0.03 |
| Sex                    | 0.01        | 0.01  | 0.01  | 0.01  | 0.500        | 0.540   | 0.640   | 0.574   | 0.05  | 0.04  | 0.03  | 0.04  |
| Syndromic diagnosis    | -0.15       | -0.15 | -0.15 | -0.15 | <0.001*      | <0.001* | <0.001* | <0.001* | -0.48 | -0.49 | -0.49 | -0.49 |
| Hypertension           | -0.02       | -0.02 | -0.02 | -0.02 | 0.349        | 0.356   | 0.428   | 0.355   | -0.07 | -0.06 | -0.06 | -0.07 |
| Diabetes mellitus      | -0.01       | -0.01 | -0.00 | -0.00 | 0.887        | 0.888   | 0.945   | 0.915   | -0.01 | -0.01 | -0.00 | -0.01 |
| Dyslipidemia           | -0.05       | -0.05 | -0.05 | -0.05 | 0.023        | 0.021   | 0.018   | 0.029   | -0.16 | -0.16 | -0.16 | -0.15 |
| Heart disease          | 0.03        | 0.03  | 0.03  | 0.03  | 0.405        | 0.425   | 0.335   | 0.465   | 0.06  | 0.05  | 0.06  | 0.05  |
| Respiratory disease    | 0.02        | 0.02  | 0.01  | 0.02  | 0.576        | 0.572   | 0.682   | 0.564   | 0.04  | 0.04  | 0.03  | 0.04  |
| Smoking                | -0.03       | -0.03 | -0.03 | -0.03 | 0.135        | 0.146   | 0.123   | 0.130   | -0.10 | -0.10 | -0.11 | -0.11 |
| A status               | -0.19       | -0.09 | -0.40 | 0.11  | 0.488        | 0.743   | 0.056   | 0.543   | -0.55 | -0.27 | -1.18 | 0.33  |
| VD Nasal               | 0.00        | 0.00  | 0.00  | 0.00  | 0.537        | 0.270   | 0.275   | 0.212   | 0.06  | 0.09  | 0.09  | 0.11  |
| VD Temporal            | 0.00        | 0.00  | 0.00  | 0.00  | 0.702        | 0.795   | 0.683   | 0.733   | 0.04  | 0.03  | 0.04  | 0.03  |
| VD Superior            | -0.00       | -0.00 | -0.00 | -0.00 | 0.490        | 0.489   | 0.109   | 0.442   | -0.05 | -0.05 | -0.15 | -0.06 |
| VD Inferior            | -0.00       | -0.00 | -0.00 | -0.00 | 0.281        | 0.325   | 0.341   | 0.956   | -0.08 | -0.07 | -0.06 | -0.01 |
| VD Nasal * A status    | 0.00        |       |       |       | 0.523        |         |         |         | 0.50  |       |       |       |
| VD Temporal * A status |             | 0.00  |       |       |              | 0.785   |         |         |       | 0.22  |       |       |
| VD Superior * A status |             |       | 0.01  |       |              |         | 0.065   |         |       |       | 1.14  |       |
| VD Inferior * A status |             |       |       | -0.00 |              |         |         | 0.486   |       |       |       | -0.38 |
